# Supplementary material for: Association Between In-Person vs Telehealth Follow-up and Rates of Repeated Hospital Visits Among Patients Seen in the Emergency Department
Source: PubMed Central journal article supplement (PMC9597390; doi:10.1001/jamanetworkopen.2022.37783), 2022-10-25
Supplement: jamanetwopen-e2237783-s001.pdf [file jamanetwopen-e2237783-s001.pdf]

## Supplemental Online Content

Shah VV, Villaflores CW, Chuong LH, et al. Association between in-person vs telehealth follow-up and rates of repeated hospital visits among patients seen in the emergency department. *JAMA Netw Open*. 2022;5(10):e2237783. doi:10.1001/jamanetworkopen.2022.37783

**eTable 1.** Percentage Missing of Each Covariate

**eTable 2.** Odds Ratios and Descriptive Statistics for Participants With Missing RAF Scores

**eTable 3.** Wald Test for Interaction Models

**eTable 4.** Odds Ratios, Average Marginal Probabilities, and Average Marginal Effects on ED Returns per 1000 Encounters, Adjusting for RAF Scores

**eTable 5.** Odds Ratios, Average Marginal Probabilities, and Average Marginal Effects on Hospitalizations per 1000 Encounters, Adjusting for RAF Scores

**eTable 6.** Odds Ratios of ED Return Visits and Hospitalizations After Excluding COVID-19 and Related Diagnoses at Index ED Visit

**eTable 7.** Adjusted Odds Ratios of ED Returns and Hospitalization by Modality of Telehealth Visit

This supplemental material has been provided by the authors to give readers additional information about their work.

**eTable 1.** Percentage Missing of Each Covariate

| <b>Variable</b>              | <b>Missing</b> | <b>Total</b> | <b>Percent Missing</b> |
|------------------------------|----------------|--------------|------------------------|
| Patient Age                  | 0              | 17,845       | 0                      |
| sex                          | 0              | 17,845       | 0                      |
| race                         | 306            | 17,845       | 1.71                   |
| ethnicity                    | 286            | 17,845       | 1.6                    |
| language                     | 0              | 17,845       | 0                      |
| Social Vulnerability Index   | 0              | 17,845       | 0                      |
| Distance to ED               | 210            | 17,845       | 1.18                   |
| First ED Visit Billing Level | 90             | 17,845       | 0.5                    |
| Time Period                  | 0              | 17,845       | 0                      |
| Specific ED                  | 0              | 17,845       | 0                      |
| Time to Follow - up          | 0              | 17,845       | 0                      |
| RAF Score                    | 2,417          | 17,845       | 13.54                  |

**eTable 2.** Odds Ratios and Descriptive Statistics for Participants With Missing RAF Scores

eTable 2a: Odd ratio of missing RAF Score

| VARIABLES                                  | Missing RAF Score |
|--------------------------------------------|-------------------|
| race = 1, Asian                            | 0.848*            |
| race = 2, Black/African American           | 0.512***          |
| race = 3, Native Hawaiian/Pacific Islander | 0.849             |
| race = 4, American Indian/Alaska Native    | 0.660             |
| race = 5, Other Race*                      | 0.947             |
| ethnicity = 1, Hispanic/Latinx             | 0.517***          |
| language = 1, English as Primary Language  | 0.641***          |
| LogDistance                                | 1.142***          |
| insurance = 2, Medicare                    | 1.068             |
| insurance = 3, Medicaid                    | 2.216***          |
| insurance = 4, Other Insurance             | 2.529***          |
| insurance = 5, Uninsured                   | 14.12***          |
| PatientAge                                 | 0.975***          |
| FirstED_AcuityLevelCode = 2                | 0.299             |
| FirstED_AcuityLevelCode = 3                | 0.287             |
| FirstED_AcuityLevelCode = 4                | 0.422             |
| FirstED_AcuityLevelCode = 5                | 0.387             |
| Social Vulnerability Index                 | 1.006***          |
| quarter = 3, 07/20-09/20                   | 1.233**           |
| quarter = 4, 10/20-12/20                   | 1.071             |
| quarter = 5, 01/21-03/21                   | 0.842*            |
| quarter = 6, 04/21-06/21                   | 0.956             |
| quarter = 7, 07/21-09/21                   | 1.066             |
| ED = 2                                     | 0.660***          |
| Time To Follow Up                          | 1.061***          |
| ED Return                                  | 0.573***          |
| Inpatient Admission                        | 0.879             |
| Telehealth                                 | 0.640***          |
| Observations                               | 16,987            |

\*includes the following responses: “other,” “unknown,” and “decline to state.”

| Supplement eTable 2b: Descriptive Statistics for Study Population Missing RAF Score |  |                   |                       |
|-------------------------------------------------------------------------------------|--|-------------------|-----------------------|
|                                                                                     |  | Missing RAF Score | NOT Missing RAF Score |
| Number of Patients                                                                  |  | 2,058             | 10,863                |
| Number of Encounters                                                                |  | 2,307             | 14,680                |
| Average Days to Follow-Up (SD)                                                      |  | 7 (4)             | 6 (4)                 |
| Average Patient Age (SD)                                                            |  | 43 (19)           | 55 (20)               |
| <b>Encounter Type % (n)</b>                                                         |  |                   |                       |
| In-Person Visit                                                                     |  | 78% (1,790)       | 68% (10,028)          |
| Telehealth                                                                          |  | 22% (517)         | 32% (4,652)           |
| <b>Outcome Measures, % Encounters (n)</b>                                           |  |                   |                       |
| ED return                                                                           |  | 11% (244)         | 17% (2558)            |
| Hospitalization                                                                     |  | 2% (52)           | 4% (624)              |
| <b>Sex % (n)</b>                                                                    |  |                   |                       |
| Male                                                                                |  | 49% (1,135)       | 42% (6,138)           |
| Female                                                                              |  | 51% (1,172)       | 58% (8,542)           |
| <b>Ethnicity % (n)</b>                                                              |  |                   |                       |
| Not Hispanic/Latinx                                                                 |  | 79% (1,820)       | 77% (11,361)          |
| Hispanic/Latinx                                                                     |  | 21% (487)         | 23% (3,319)           |
| <b>Primary Language % (n)</b>                                                       |  |                   |                       |
| Not English                                                                         |  | 8% (178)          | 8% (1,124)            |
| English                                                                             |  | 92% (2,129)       | 92% (13,556)          |
| <b>Race % (n)</b>                                                                   |  |                   |                       |
| American Indian/Alaska Native                                                       |  | < 1% (9)          | < 1% (93)             |
| Asian                                                                               |  | 9% (219)          | 9% (1,260)            |
| Black/African American                                                              |  | 10% (229)         | 12% (1,780)           |
| Native Hawaiian/Pacific Islander                                                    |  | < 1% (6)          | < 1% (40)             |
| White                                                                               |  | 58% (1,337)       | 58% (8,521)           |
| Other Race*                                                                         |  | 22% (507)         | 20% (2,986)           |
| <b>Primary Insurance % (n)</b>                                                      |  |                   |                       |
| Commercial                                                                          |  | 55% (1,280)       | 58% (8,551)           |
| Medicare                                                                            |  | 17% (396)         | 32% (4,654)           |
| Medicaid                                                                            |  | 18% (406)         | 8% (1,167)            |
| Other Insurance                                                                     |  | 5% (115)          | 2% (258)              |
| Uninsured                                                                           |  | 5% (110)          | < 1% (50)             |

| Billing Level of Initial ED Encounter % (n) |  |             |             |
|---------------------------------------------|--|-------------|-------------|
| 1                                           |  | < 1% (5)    | < 1% (3)    |
| 2                                           |  | 15% (357)   | 15% (2,265) |
| 3                                           |  | 59% (1,365) | 66% (9,751) |
| 4                                           |  | 24% (552)   | 17% (2,546) |
| 5                                           |  | 1% (28)     | < 1% (115)  |
| Median Distance to ED (IQR)                 |  | 12 (6-32)   | 10 (6-20)   |
| Social Vulnerability Index (SD)             |  | 40 (29)     | 48 (33)     |

\*includes the following responses: "other," "unknown," and "decline to state."

| Supplement eTable 2c: Descriptive Statistics for Study Population Missing RAF Score |                                                 |                                                 |
|-------------------------------------------------------------------------------------|-------------------------------------------------|-------------------------------------------------|
|                                                                                     | Missing RAF Score                               |                                                 |
|                                                                                     | In-person Visit<br>Cohort<br>(Total n = 11,818) | Telehealth Visit<br>Cohort<br>(Total n = 5,169) |
| Encounters % of total cohort (n)                                                    | 15% (1,790)                                     | 10% (517)                                       |
| Outcome Measures % of total encounters (n)                                          |                                                 |                                                 |
| ED Return                                                                           | 1.6% (185)                                      | 1.1% (59)                                       |
| Hospitalization                                                                     | 3.4% (40)                                       | 0.2% (12)                                       |
| Continuous Variables                                                                |                                                 |                                                 |
| Average Days to Follow-Up (SD)                                                      | 7 (4)                                           | 7 (4)                                           |
| Average Patient Age (SD)                                                            | 44 (19)                                         | 42 (18)                                         |
| Median Distance to ED (IQR)                                                         | 12 (6-29)                                       | 14 (6-37)                                       |
| Mean Social Vulnerability Index (SD)                                                | 49 (33)                                         | 46 (31)                                         |
| Sex % of total cohort encounters (n)                                                |                                                 |                                                 |
| Male                                                                                | 8% (931)                                        | 4% (204)                                        |
| Female                                                                              | 7% (859)                                        | 6% (313)                                        |
| Ethnicity % of total cohort encounters (n)                                          |                                                 |                                                 |
| Not Hispanic/Latinx                                                                 | 12% (1,429)                                     | 8% (391)                                        |
| Hispanic/Latinx                                                                     | 3% (361)                                        | 2% (126)                                        |
| Primary Language % of total encounters (n)                                          |                                                 |                                                 |
| Not English                                                                         | 1% (134)                                        | 1% (44)                                         |
| English                                                                             | 14% (1,656)                                     | 9% (473)                                        |
| Race % of total cohort encounters (n)                                               |                                                 |                                                 |
| American Indian/Alaska Native                                                       | < 1% (9)                                        | < 1% (0)                                        |
| Asian                                                                               | 1% (157)                                        | 1% (62)                                         |
| Black/African American                                                              | 2% (188)                                        | 1% (41)                                         |
| Native Hawaiian/Pacific Islander                                                    | < 1% (3)                                        | < 1% (3)                                        |
| White                                                                               | 9% (1,050)                                      | 6% (287)                                        |
| Other Race*                                                                         | 3% (383)                                        | 2% (124)                                        |
| Primary Insurance % of total cohort encounters (n)                                  |                                                 |                                                 |
| Commercial                                                                          | 9% (966)                                        | 6% (314)                                        |

|                                                |            |           |
|------------------------------------------------|------------|-----------|
| Medicare                                       | 3% (314)   | 2% (82)   |
| Medicaid                                       | 3% (317)   | 2% (89)   |
| Other Insurance                                | 1% (96)    | < 1% (19) |
| Uninsured                                      | 1% (97)    | < 1% (13) |
| Billing Level % of total cohort encounters (n) |            |           |
| 1                                              | < 1% (4)   | < 1% (1)  |
| 2                                              | 2% (250)   | 2% (107)  |
| 3                                              | 9% (1,043) | 6% (322)  |
| 4                                              | 4% (471)   | 2% (81)   |
| 5                                              | < 1% (4)   | < 1% (6)  |

**eTable 3.** Wald Test for Interaction Models

| <b>Outcome</b>  | <b>Added parameter</b>     | <b>P-Value of Wald Test</b> |
|-----------------|----------------------------|-----------------------------|
| ED Recidivism   | Encounter Type#Time Period | p = 0.3053                  |
| Hospitalization | Encounter Type#Time Period | p = 0.6916                  |



| <b>eTable 4. Odds Ratios, Average Marginal Probabilities, and Average Marginal Effects on ED Returns per 1000 Encounters, Adjusting for RAF Scores (N = 14,630)</b> |            |                              |                                             |                                            |                            |
|---------------------------------------------------------------------------------------------------------------------------------------------------------------------|------------|------------------------------|---------------------------------------------|--------------------------------------------|----------------------------|
| ED Return                                                                                                                                                           | Odds Ratio | Average marginal probability | Average marginal effect per 1000 encounters | 95% Confidence Interval of marginal effect | P-Value of marginal effect |
| <b>Encounter Type</b>                                                                                                                                               |            |                              |                                             |                                            |                            |
| In-Person post ED discharge visit                                                                                                                                   | Reference  | 16.9%                        | Reference                                   | Reference                                  | Reference                  |
| Telehealth post ED discharge visit                                                                                                                                  | 1.138      | 18.6%                        | 17.3                                        | (1.1 - 33.5)                               | 0.037                      |
| <b>Sex</b>                                                                                                                                                          |            |                              |                                             |                                            |                            |
| Male                                                                                                                                                                | Reference  | 18.3%                        | Reference                                   | Reference                                  | Reference                  |
| Female                                                                                                                                                              | 0.891      | 16.7%                        | -15.3                                       | (-40.1 – 9.5)                              | 0.227                      |
| <b>Race</b>                                                                                                                                                         |            |                              |                                             |                                            |                            |
| American Indian/Alaska Native                                                                                                                                       | 1.307      | 21.5%                        | 38.5                                        | (-45.4 – 122.3)                            | 0.369                      |
| Asian                                                                                                                                                               | 0.733      | 13.8%                        | -37.8                                       | (-76.8 – 1.1)                              | 0.057                      |
| Black/African American                                                                                                                                              | 1.166      | 19.8%                        | 21.4                                        | (-21.7 – 64.6)                             | 0.330                      |
| Native Hawaiian/Pacific Islander                                                                                                                                    | 0.548      | 10.9%                        | -67.0                                       | (-168.4 – 34.4)                            | 0.195                      |
| White                                                                                                                                                               | Reference  | 17.6%                        | Reference                                   | Reference                                  | Reference                  |
| Other*                                                                                                                                                              | 0.930      | 16.7%                        | -9.5                                        | (-35.5 – 17.5)                             | 0.479                      |
| <b>Ethnicity</b>                                                                                                                                                    |            |                              |                                             |                                            |                            |
| Not Hispanic/Latinx                                                                                                                                                 | Reference  | 17.6%                        | Reference                                   | Reference                                  | Reference                  |
| Hispanic/Latinx                                                                                                                                                     | 0.937      | 16.8%                        | -8.5                                        | (-34.0 – 16.9)                             | 0.533                      |
| <b>Language</b>                                                                                                                                                     |            |                              |                                             |                                            |                            |
| Not English as Primary Language                                                                                                                                     | Reference  | 16.4%                        | Reference                                   | Reference                                  | Reference                  |
| English as Primary Language                                                                                                                                         | 1.093      | 17.5%                        | 11.4                                        | (-19.4 – 42.3)                             | 0.467                      |
| <b>Insurance Type</b>                                                                                                                                               |            |                              |                                             |                                            |                            |
| Commercial Insurance                                                                                                                                                | Reference  | 14.7%                        | Reference                                   | Reference                                  | Reference                  |
| Medicare                                                                                                                                                            | 1.409      | 19.2%                        | 45.1                                        | (11.9 – 78.3)                              | 0.008                      |
| Medicaid                                                                                                                                                            | 2.445      | 28.5%                        | 137.6                                       | (86.7 – 188.5)                             | <0.001                     |
| Uninsured                                                                                                                                                           |            |                              |                                             |                                            | N/A                        |
| Other Insurance                                                                                                                                                     | 0.792      | 12.2%                        | -25.5                                       | (-76.4 – 25.5)                             | 0.327                      |
| <b>First ED Visit Billing Level</b>                                                                                                                                 |            |                              |                                             |                                            |                            |
| Low Acuity (Billing Levels 1 and 2)                                                                                                                                 | 0.830      | 15.7%                        | -24.0                                       | (-43.2 – -4.7)                             | 0.015                      |
| Medium Acuity (Billing Level 3)                                                                                                                                     | Reference  | 18.1%                        | Reference                                   | Reference                                  | Reference                  |
| High Acuity (Billing Level 4 and 5)                                                                                                                                 | 0.897      | 16.6%                        | -14.3                                       | (-33.2 – 4.5)                              | 0.136                      |
| <b>Time Period</b>                                                                                                                                                  |            |                              |                                             |                                            |                            |
| 04/20-06/20                                                                                                                                                         | 1.051      | 17.2%                        | 6.4                                         | (-20.6 – 33.5)                             | 0.641                      |
| 07/20-09/20                                                                                                                                                         | 1.048      | 17.2%                        | 6.0                                         | (-19.0 – 31.0)                             | 0.636                      |
| 10/20 - 12/20                                                                                                                                                       | Reference  | 16.6%                        | Reference                                   | Reference                                  | Reference                  |
| 01/21-03/21                                                                                                                                                         | 1.146      | 18.4%                        | 18.0                                        | (-8.1 – 44.1)                              | 0.177                      |
| 04/21-06/21                                                                                                                                                         | 1.060      | 17.3%                        | 7.6                                         | (-16.3 – 31.4)                             | 0.535                      |
| 07/21-09/21                                                                                                                                                         | 1.100      | 17.8%                        | 12.2                                        | (-12.7 – 37.2)                             | 0.338                      |

| Emergency Department       |           |       |           |                 |           |
|----------------------------|-----------|-------|-----------|-----------------|-----------|
| ED #1                      | Reference | 16.0% | Reference | Reference       | Reference |
| ED #2                      | 1.233     | 18.7% | 27.5      | (3.4 – 51.6)    | 0.025     |
| Continuous Variables**     |           |       |           |                 |           |
| Time to Follow-up***       | 0.687     | 16.0% | -52.0     | (-81.0 - -23.0) | <0.001    |
| Social Vulnerability Index | 1.005     | 17.4% | 0.7       | (0.3 – 1.1)     | <0.001    |
| Patient Age                | 0.993     | 17.8% | -0.9      | (-1.6 - -0.2)   | 0.015     |
| Log Distance to Hospital   | 0.951     | 17.4% | -7.0      | (-18.3 – 5.0)   | 0.258     |
| RAF Score                  | 1.370     | 15.4% | 41.5      | (35.5 – 47.6)   | <0.001    |

\* includes the following responses: “other,” “unknown,” and “decline to state.”

\*\*Average marginal probability calculated at mean of each continuous variable

\*\*\*Odds ratio calculated at mean

**eTable 5.** Odds Ratios, Average Marginal Probabilities, and Average Marginal Effects on Hospitalizations per 1000 Encounters, Adjusting for RAF Scores (N = 14,628)

| ED Return                           | Odds Ratio | Average marginal probability | Average marginal effect per 1000 encounters | 95% Confidence Interval of marginal effect | P-Value of marginal effect |
|-------------------------------------|------------|------------------------------|---------------------------------------------|--------------------------------------------|----------------------------|
| <b>Encounter Type</b>               |            |                              |                                             |                                            |                            |
| In-Person post ED discharge visit   | Reference  | 4.0%                         | Reference                                   | Reference                                  | Reference                  |
| Telehealth post ED discharge visit  | 1.192      | 4.7%                         | 6.7                                         | (-1.0 – 14.4)                              | 0.086                      |
| <b>Sex</b>                          |            |                              |                                             |                                            |                            |
| Male                                | Reference  | 4.5%                         | Reference                                   | Reference                                  | Reference                  |
| Female                              | 0.875      | 4.0%                         | -5.0                                        | (-12.8 – 2.8)                              | 0.209                      |
| <b>Race</b>                         |            |                              |                                             |                                            |                            |
| White                               | Reference  | 4.3%                         | Reference                                   | Reference                                  | Reference                  |
| Asian                               | 0.810      | 3.6%                         | -7.3                                        | (-19.5 – 4.9)                              | 0.242                      |
| Black/African American              | 1.022      | 4.4%                         | 0.8                                         | (-10.0 – 11.7)                             | 0.879                      |
| Native Hawaiian/Pacific Islander    | 2.590      | 9.5%                         | 52.3                                        | (-64.2 – 168.7)                            | 0.379                      |
| American Indian/Alaska Native       | 0.714      | 3.2%                         | -11.1                                       | (-57.6 – 35.4)                             | 0.640                      |
| Other*                              | 0.993      | 4.3%                         | -0.3                                        | (-11.4 – 10.9)                             | 0.964                      |
| <b>Ethnicity</b>                    |            |                              |                                             |                                            |                            |
| Not Hispanic/Latinx                 | Reference  | 4.2%                         | Reference                                   | Reference                                  | Reference                  |
| Hispanic/Latinx                     | 1.056      | 4.4%                         | 2.1                                         | (-9.7 – 13.8)                              | 0.732                      |
| <b>Language</b>                     |            |                              |                                             |                                            |                            |
| Not English as Primary Language     | Reference  | 5.7%                         | Reference                                   | Reference                                  | Reference                  |
| English as Primary Language         | 0.683      | 4.1%                         | -16.0                                       | (-30.8 – -1.3)                             | 0.033                      |
| <b>Insurance Type</b>               |            |                              |                                             |                                            |                            |
| Commercial Insurance                | Reference  | 4.0%                         | Reference                                   | Reference                                  | Reference                  |
| Medicare                            | 1.034      | 4.1%                         | 1.2                                         | (-7.7 – 10.0)                              | 0.739                      |
| Medicaid                            | 1.889      | 6.9%                         | 29.1                                        | (9.0 – 49.2)                               | 0.005                      |
| Uninsured                           | N/A        |                              |                                             |                                            |                            |
| Other Insurance                     | 0.214      | 1.0%                         | -30.3                                       | (-44.2 – -16.4)                            | <0.001                     |
| <b>First ED Visit Billing Level</b> |            |                              |                                             |                                            |                            |
| Low Acuity (Billing Levels 1 and 2) | 1.373      | 5.6%                         | 13.6                                        | (3.1 – 24.1)                               | 0.011                      |
| Medium Acuity (Billing Level 3)     | Reference  | 4.3%                         | Reference                                   | Reference                                  | Reference                  |
| High Acuity (Billing Level 4 and 5) | 0.547      | 2.5%                         | -17.9                                       | (-25.3 – -10.5)                            | <0.001                     |
| <b>Time Period</b>                  |            |                              |                                             |                                            |                            |
| 04/20-06/20                         | 1.189      | 4.4%                         | 6.2                                         | (-6.2 – 18.7)                              | 0.325                      |
| 07/20-09/20                         | 1.199      | 4.5%                         | 6.6                                         | (-5.6 – 18.7)                              | 0.289                      |
| 10/20 - 12/20                       | Reference  | 3.8%                         | Reference                                   | Reference                                  | Reference                  |
| 01/21-03/21                         | 1.071      | 4.0%                         | 2.4                                         | (-8.8 – 13.6)                              | 0.679                      |

|                               |           |      |           |                 |           |
|-------------------------------|-----------|------|-----------|-----------------|-----------|
| 04/21-06/21                   | 1.220     | 4.5% | 7.3       | (-3.8 – 18.3)   | 0.198     |
| 07/21-09/21                   | 1.136     | 4.3% | 4.5       | (-6.6 – 15.6)   | 0.425     |
| <b>Emergency Department</b>   |           |      |           |                 |           |
| ED #1                         | Reference | 3.5% | Reference | Reference       | Reference |
| ED #2                         | 1.537     | 5.1% | 15.8      | (8.0 – 23.7)    | <0.001    |
| <b>Continuous Variables**</b> |           |      |           |                 |           |
| Time to Follow-up***          | 0.699     | 3.8% | -14.0     | (-27.1 -- -0.8) | 0.037     |
| Social Vulnerability Index    | 1.004     | 4.2% | 0.16      | (0.0 - 0.3)     | 0.032     |
| Patient Age                   | 1.006     | 4.1% | 0.22      | (0.0 – 0.5)     | 0.086     |
| Log Distance to Hospital      | 1.069     | 4.2% | 2.5       | (-0.7 – 5.6)    | 0.126     |
| RAF Score                     | 1.520     | 2.8% | 15.6      | (13.6 – 17.6)   | <0.001    |

\* includes the following responses: “other,” “unknown,” and “decline to state.”

\*\*Average marginal probability calculated at mean of each continuous variable

\*\*\*Odds ratio calculated at mean

**eTable 6.** Odds Ratios of ED Return Visits and Hospitalizations After Excluding COVID-19 and Related Diagnoses at Index ED Visit

| VARIABLES                                                                             | ED Return | Hospitalization |
|---------------------------------------------------------------------------------------|-----------|-----------------|
| Telehealth (Reference = In-person Visit)                                              | 1.272***  | 1.356***        |
| Social Vulnerability Index                                                            | 1.005***  | 1.003           |
| Patient Age                                                                           | 1.002     | 1.018***        |
| Female (Reference = Male)                                                             | 0.815**   | 0.710***        |
| Race (Reference = White)                                                              |           |                 |
| Asian                                                                                 | 0.751*    | 0.950           |
| Black/African American                                                                | 1.230     | 1.175           |
| Native Hawaiian/Pacific Islander                                                      | 0.249**   | 0.586           |
| American Indian/Alaska Native                                                         | 1.642     | 1.000           |
| Other (includes the following responses: "other," "unknown," and "decline to state.") | 0.993     | 1.119           |
| Ethnicity (Reference = not Hispanic/Latinx)                                           |           |                 |
| Hispanic/Latinx                                                                       | 0.981     | 1.169           |
| English as Primary Language                                                           | 1.023     | 0.701**         |
| Insurance (Reference = Commercial Insurance)                                          |           |                 |
| Medicare                                                                              | 1.676***  | 1.364**         |
| Medicaid                                                                              | 2.912***  | 2.493***        |
| Uninsured                                                                             | 0.819     | 1.172           |
| Other Insurance                                                                       | 0.865     | 0.475           |
| First ED Visit Acuity Level (Reference = Medium Acuity)                               |           |                 |
| Low Acuity (Billing Levels 1 and 2)                                                   | 0.956     | 1.506***        |
| High Acuity (Billing Levels 4 and 5)                                                  | 0.755***  | 0.452***        |
| Time Period (Reference = 10/20 - 12/20)                                               |           |                 |
| 04/20-06/20                                                                           | 1.032     | 1.243           |
| 07/20-09/20                                                                           | 1.036     | 1.212           |
| 01/21-03/21                                                                           | 1.128     | 1.047           |
| 04/21-06/21                                                                           | 1.063     | 1.209           |
| 07/21-09/21                                                                           | 1.064     | 1.119           |
| Log Distance to Hospital                                                              | 0.981     | 1.125***        |
| ED #2 (Reference = ED #1)                                                             | 1.232**   | 1.446***        |
| Time To Follow Up                                                                     | 0.730***  | 0.710**         |
| Observations                                                                          | 15,979    | 15,979          |
| *** p<0.01, ** p<0.05, * p<0.1                                                        |           |                 |

**eTable 7.** Adjusted Odds Ratios of ED Returns and Hospitalization by Modality of Telehealth Visit

| VARIABLES                                                                             | ED Return | Hospitalization |
|---------------------------------------------------------------------------------------|-----------|-----------------|
| Video Visit (n = 4,172, Reference = In-person Visit)                                  | 1.226***  | 1.371***        |
| Phone Visit (n = 997, Reference = In-person Visit)                                    | 1.251**   | 1.149           |
| Social Vulnerability Index                                                            | 1.005***  | 1.004*          |
| Patient Age                                                                           | 1.002     | 1.019***        |
| Female (Reference = Male)                                                             | 0.808**   | 0.699***        |
| Race (Reference = White)                                                              |           |                 |
| American Indian/Alaska Native                                                         | 1.626     | 1.229           |
| Asian                                                                                 | 0.755*    | 0.920           |
| Black/African American                                                                | 1.222     | 1.165           |
| Native Hawaiian/Pacific Islander                                                      | 0.471     | 1.771           |
| Other (includes the following responses: "other," "unknown," and "decline to state.") | 0.970     | 1.103           |
| Ethnicity (Reference = not Hispanic/Latinx)                                           |           |                 |
| Hispanic/Latinx                                                                       | 0.982     | 1.151           |
| English as Primary Language                                                           | 1.038     | 0.694**         |
| Insurance (Reference = Commercial Insurance)                                          |           |                 |
| Medicare                                                                              | 1.674***  | 1.349**         |
| Medicaid                                                                              | 2.879***  | 2.562***        |
| Uninsured                                                                             | 0.880     | 0.463           |
| Other Insurance                                                                       | 0.770     | 1.120           |
| First ED Visit Acuity Level (Reference = Medium Acuity)                               |           |                 |
| Low Acuity (Billing Levels 1 and 2)                                                   | 0.995     | 1.601***        |
| High Acuity (Billing Levels 4 and 5)                                                  | 0.764***  | 0.436***        |
| Time Period (Reference = 10/20 - 12/20)                                               |           |                 |
| 04/20-06/20                                                                           | 1.042     | 1.201           |
| 07/20-09/20                                                                           | 1.031     | 1.167           |
| 01/21-03/21                                                                           | 1.110     | 0.988           |
| 04/21-06/21                                                                           | 1.067     | 1.191           |
| 07/21-09/21                                                                           | 1.078     | 1.072           |
| Log Distance to Hospital                                                              | 0.981     | 1.110***        |
| ED #2 (Reference = ED #1)                                                             | 1.242**   | 1.483***        |
| Time To Follow Up                                                                     | 0.716***  | 0.685**         |
| Observations                                                                          | 16,987    | 16,987          |
| *** p<0.01, ** p<0.05, * p<0.1                                                        |           |                 |
